# Supplementary material for: Surface-mounted carbon quantum dots onto photonic crystals generating dual structural-fluorescent color rendering
Source: Royal Society of Chemistry journal article supplement (doi:10.1039/d4cc05618c), 2024-01-01
Supplement: d4cc05618c1.pdf [file d4cc05618c1.pdf]

## Electronic Supplementary Information (ESI)

### Surface-mounted carbon quantum dots onto photonic crystal generating dual structural-fluorescent color rendering

Wenyang Bian,<sup>‡</sup><sup>a</sup> Sijia Wang,<sup>‡</sup><sup>a</sup> Ruitao Zhou,<sup>a</sup> Zhimin Ye,<sup>c</sup> Wenjun Yuan,<sup>a</sup> Hengyang Xiang,<sup>a</sup> Aming Xie,<sup>b</sup> Juan Liu,<sup>\*d</sup> Haibo Zeng<sup>\*a</sup> and Weijin Li<sup>\*a</sup>

<sup>a</sup> MIIT Key Laboratory of Advanced Display Materials and Devices, Institute of Optoelectronics & Nanomaterials, School of Materials Science and Engineering, Nanjing University of Science and Technology, Nanjing 210094, Jiangsu, China.

<sup>b</sup> School of Mechanical Engineering, Nanjing University of Science & Technology, Nanjing 210094, China.

<sup>c</sup> Xiamen Institute of Materials, Xiamen 361116, China

<sup>d</sup> School of Chemistry and Life Sciences, Nanjing University of Posts and Telecommunications, Nanjing 210003, China

<sup>‡</sup> These authors contributed equally.

Corresponding authors should address to Prof. Weijin Li ([wjli@njust.edu.cn](mailto:wjli@njust.edu.cn))

## Content

|                                               |            |
|-----------------------------------------------|------------|
| <b>Methods and materials</b> .....            | <b>S3</b>  |
| <b>Experimental Section</b> .....             | <b>S3</b>  |
| Preparation of TiO <sub>2</sub> solution..... | <b>S4</b>  |
| Synthesis of ZIF-8 nanoparticles.....         | <b>S4</b>  |
| Synthesis of PEI-capped CDs .....             | <b>S4</b>  |
| Cleaning of Silicon Wafers .....              | <b>S4</b>  |
| <b>Supporting Figures</b> .....               | <b>S5</b>  |
| Figure. S1 .....                              | <b>S5</b>  |
| Figure. S2 .....                              | <b>S5</b>  |
| Figure. S3 .....                              | <b>S6</b>  |
| Figure. S4 .....                              | <b>S7</b>  |
| Figure. S5 .....                              | <b>S7</b>  |
| Figure. S6 .....                              | <b>S7</b>  |
| Figure. S7 .....                              | <b>S8</b>  |
| Figure. S8 .....                              | <b>S9</b>  |
| <b>Supporting Reference</b> .....             | <b>S10</b> |

## Methods and materials

XRD patterns were obtained by a Bruker-AXS D8 Advance X-ray diffractometer under Cu K $\alpha$  radiation ( $\lambda=1.5406$  Å). SEM images were obtained by a GeminiSEM 300 scanning electron microscope. HRTEM image was obtained by a Tecnai G2 F20 transmission electron microscope. FTIR spectrums were obtained by a Bruker INVENIO FTIR Spectrometer. XPS spectroscopys were obtained by a PHI QUANTERA II X-ray Photoelectron Spectrometer. Ultraviolet-Visible (UV-Vis) spectrum was obtained by a EVOLUTION220 Ultraviolet-visible Spectrophotometer. Fluorescence spectrums were obtained by CARY ECLIPSE fluorospectrophotometer. The time-resolved fluorescence lifetime was measured on a Delta Flex modular fluorescence lifetime system. Acetone, H<sub>2</sub>SO<sub>4</sub> and 30%H<sub>2</sub>O<sub>2</sub> were purchased from Sinopharm Chemical Reagent Co. Zn(CH<sub>3</sub>COOH)<sub>2</sub>·2H<sub>2</sub>O, Citric Acid (CA) and Polyethyleneimine (PEI, Mw=1800, 99%) were purchased from Heowns Biochem Technologies, in Tianjin. 2-Methylimidazole (2-MiM) was purchased from Bidepharm. Methanol, anhydrous ethanol were purchased from Titan in Shanghai. Acetic acid was purchased from Macklin. Isopropyl alcohol (IPA) was purchased from Nanjing Chemical Reagent Co., Ltd. Tetrabutyl titanate (TBT) was purchased from Meryer.

## Experimental Scetion

### Preparation of TiO<sub>2</sub> solution

First, two solutions, A and B, were prepared: solution A was prepared by adding 8 ml of TBT and 4 ml of IPA to a 100 ml blue-capped bottle; solution B was prepared by adding 8 ml of IPA, 0.42 ml of deionized water and 34  $\mu$ l of CH<sub>3</sub>COOH to a 50 ml beaker. The two solutions were stirred separately for 10 min, and then the B solution was slowly dripped into the continuously stirred A solution using a dispensing funnel (about 20 min). Finally, 13 ml of IPA was added to the mixed solution and sealed and stirred at room temperature for about 12 h to obtain a colorless and transparent TiO<sub>2</sub> solution.

The hydrolytic reaction of n-Butyl titanate (TBT) under acidic conditions (CH<sub>3</sub>COOH as a chelating agent to control the rate of hydrolysis) in isopropanol (IPA) medium is stepwise:

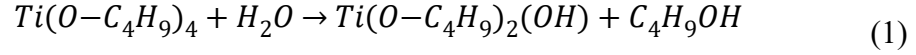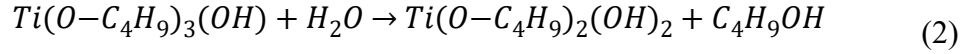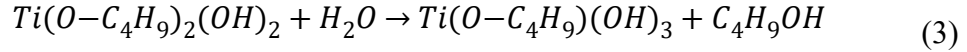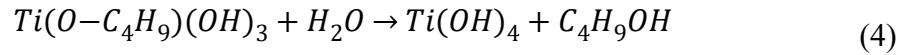

### Synthesis of ZIF-8 nanoparticles

0.876 g of Zn(CH<sub>3</sub>COOH)<sub>2</sub>·2H<sub>2</sub>O and 6.56 g of 2-MiM were dissolved in 80 mL of methanol, respectively. After sufficient stirring for 20 min, the Zn(CH<sub>3</sub>COOH)<sub>2</sub>·2H<sub>2</sub>O solution was added to the 2-MiM solution and stirred at room temperature for 30 min. Then it was centrifuged at 10000 rpm/min for 15 min, washed with methanol and acetone for three times, respectively, and finally dried at 40 °C overnight.

### Synthesis of PEI-capped CQDs

CA (0.384 g) and PEI (3.6 g) were dissolved in 90 ml of deionized water, stirred for 3 minutes, and the transparent mixture was transferred to a hydrothermal kettle for 20 h in an oven at 180°C. The result is a light yellow transparent solution, indicating the formation of CQDs, without any additional separation or purification procedures.

### Cleaning of Silicon Wafers

Silicon wafers (20 mm × 20 mm × 0.75 mm) were cleaned with ethanol and deionized water in the ultrasonic cleaners for ten minutes at least, followed by a thirty-minute immersion in Piranha solution (H<sub>2</sub>SO<sub>4</sub> : H<sub>2</sub>O<sub>2</sub>, V : V = 7:3). After thorough rinsing three times with DI, the silicon wafers were dried with nitrogen.

## Supporting Figures

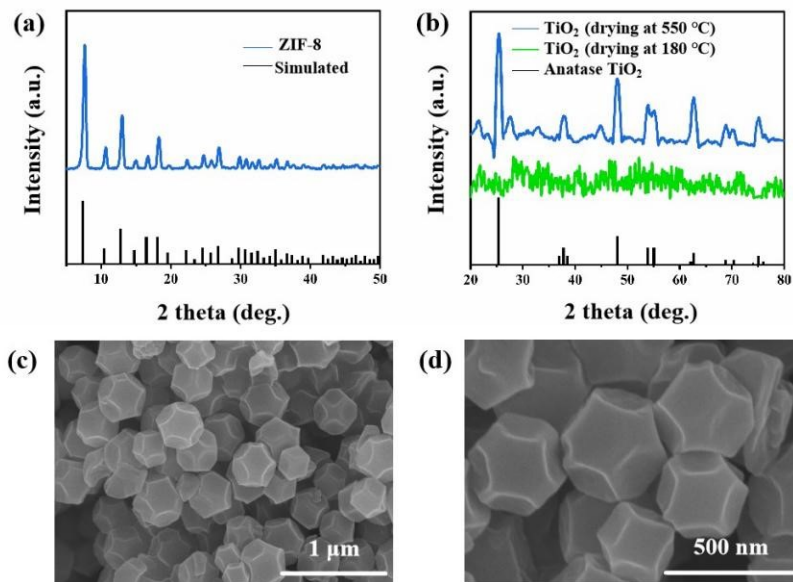

**Fig. S1** PXR D spectra of (a) ZIF-8 and (b) TiO<sub>2</sub> (Anatase TiO<sub>2</sub>, JCPDS card NO.21-1272); (c-d) SEM images of ZIF-8 nanoparticle

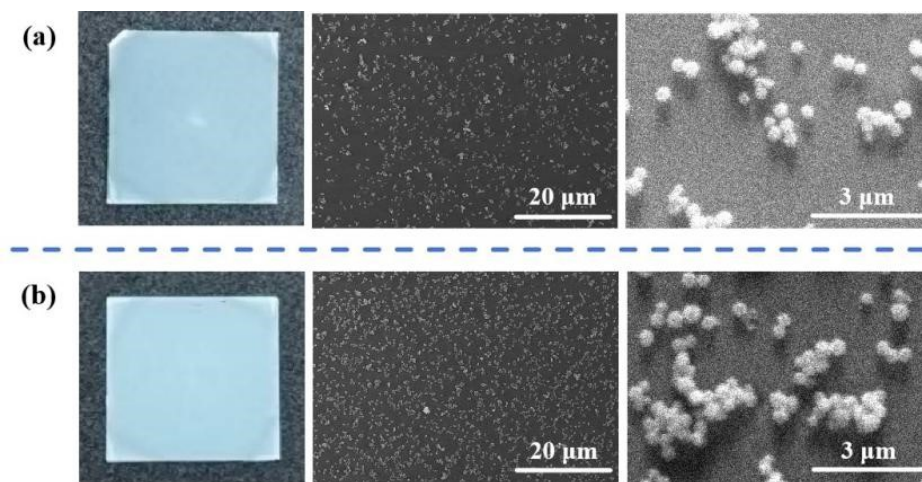

**Fig S2.** Photos and SEM images of ZIF-8 layers obtained by spin-coating with ZIF-8 suspensions (a)  $C_{\text{ZIF-8}} = 4 \text{ mg/ml}$ ; (b)  $C_{\text{ZIF-8}} = 8 \text{ mg/ml}$ .

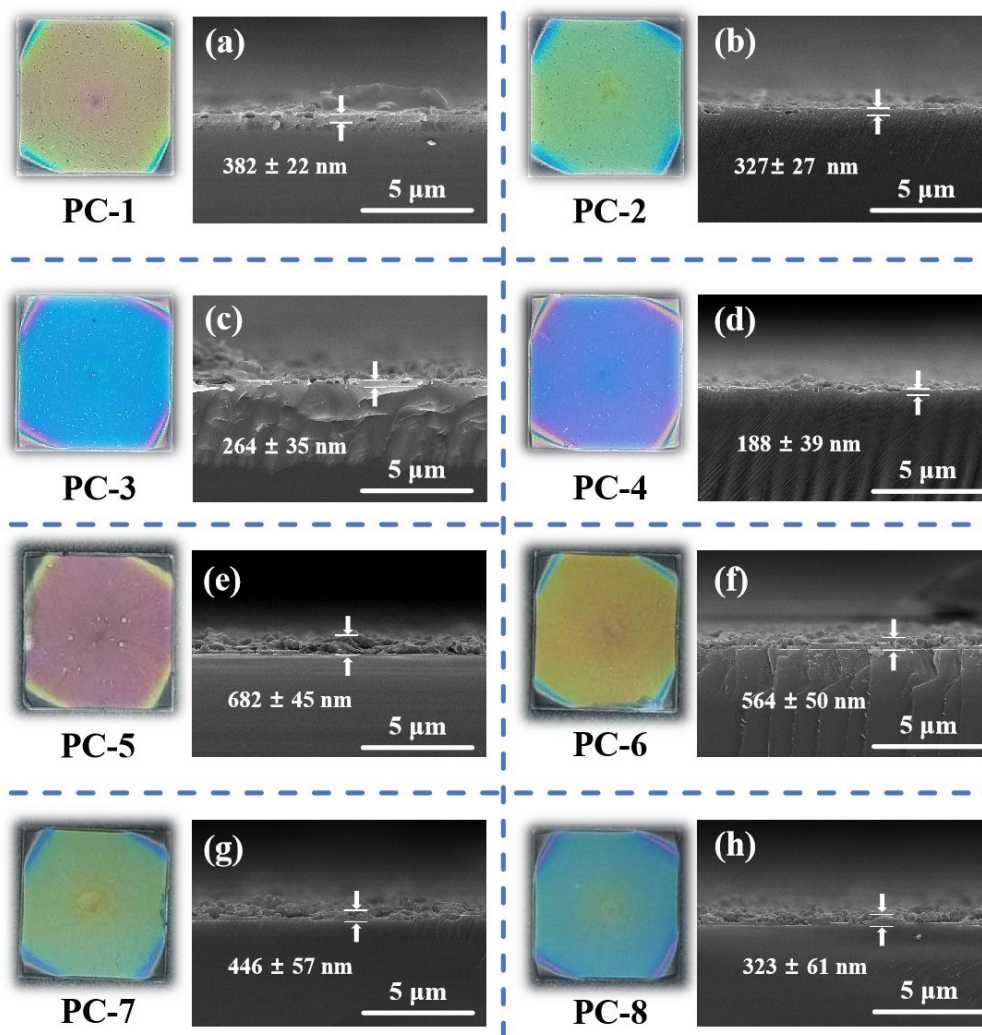

Fig S3. SEM images of cross sections of ZIF-8/TiO<sub>2</sub> 1D PCs

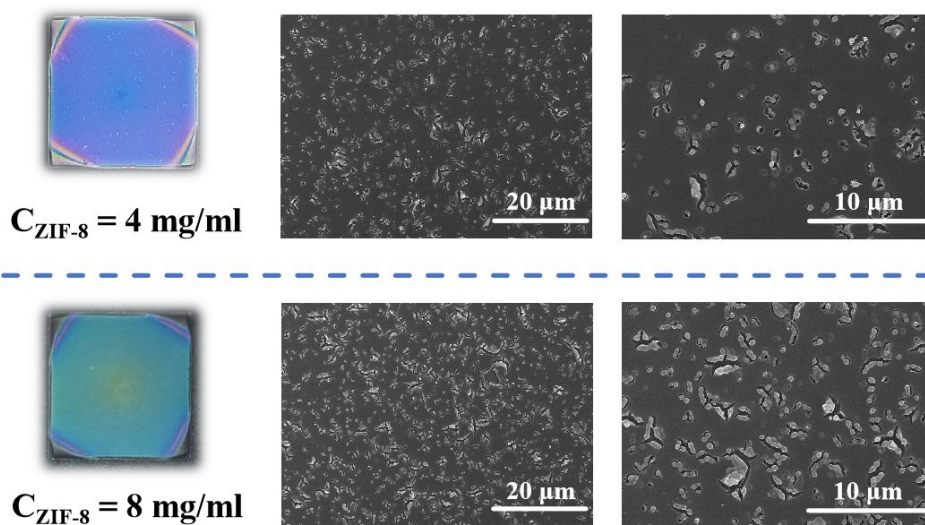

Fig S4. SEM images of top view of ZIF-8/TiO<sub>2</sub> 1D PCs



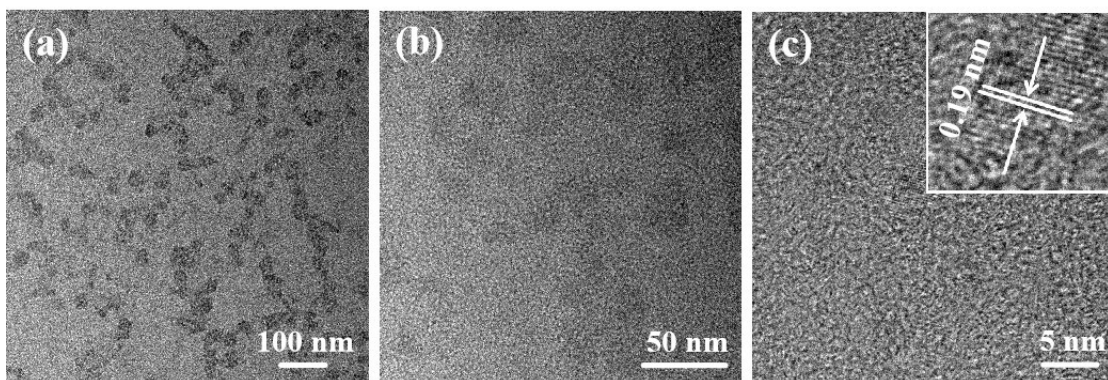

Fig S5. HRTEM images of PEI-capped CQDs

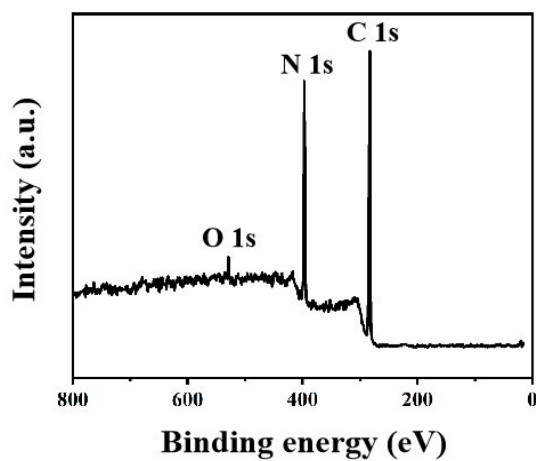

Fig S6. XPS spectra of PEI-capped CQDs

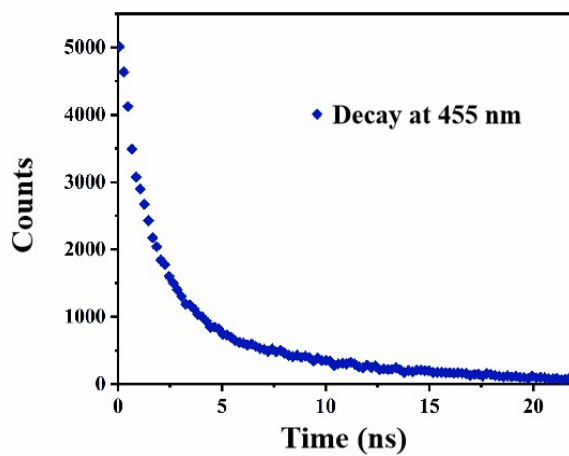

Fig S7. Time-resolved fluorescence decay of PEI-capped CQDs at 455 nm.

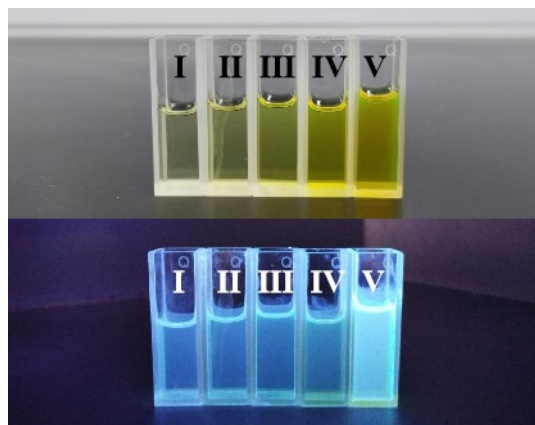

**Fig S8.** PL Intensity of CQDs dispersed in water at different concentrations:  
 $C_I=6.25\%$ ;  $C_{II}=12.5\%$ ;  $C_{III}=25\%$ ;  $C_{IV}=50\%$ ;  $C_V=100\%$ .



## Supporting References

[1] Y. Xing, Z. Wang, Y. Zhu, J. Yan and Y. Chen, *Phys. Lett. A*, 2021, **400**, 127301.

[2] Z. Zhang, Y. Tian, H. Li, Z. Lu, Y. Chen and Q. Lu, *J. Environ. Chem. Eng*, 2023, **11**, 111054.

[3] C. Wang, Z. Xu and C. Zhang, *ChemNanoMat*, 2015, **1**, 122-127.
